# Supplementary material
Source: PubMed Central journal article supplement (PMC1560298)
Supplement: rspb20053464s04.pdf [file rspb20053464s04.pdf]

Electronic supplementary material for Fénart *et al.* (doi: 10.1098/rspb.2005.3464).

Samples of *Beta vulgaris* used in the study. Sampled individuals are coded by their mitochondrial haplotype, and indexed when several individuals sharing the same haplotype were sequenced. The location (including the country) and the geographical coordinates of the populations they were sampled from are provided. B = Belgium, F = France, S = Spain, NL = Netherlands. <sup>(1)</sup> mtDNA haplotypes following the nomenclature described in Desplanque *et al.* (2000).

| <i>Sample Code</i> | <i>mtDNA haplotype<sup>(1)</sup></i> | <i>Sexual phenotype</i> | <i>Geographical Location</i>     | <i>GPS coordinates</i> |
|--------------------|--------------------------------------|-------------------------|----------------------------------|------------------------|
| A1                 | A                                    | hermaphroditic          | Wimereux (F)                     | N 50°46.1' ; E 1°36.6' |
| A2                 | A                                    | hermaphroditic          | Agde (F)                         | N 43°18.0' ; E 3°28.0' |
| A3                 | A                                    | hermaphroditic          | Mèze (F)                         | N 43°25.0' ; E 3°26.0' |
| A4                 | A                                    | hermaphroditic          | Suzac (F)                        | N 45°38.0' ; W 0°52.0' |
| B1                 | B                                    | hermaphroditic          | Talmont (F)                      | N 45°32.0' ; W 0°54.0' |
| B2                 | B                                    | hermaphroditic          | Criel (F)                        | N 50°02.2' ; E 1°19.0' |
| C                  | C                                    | hermaphroditic          | Audresselles (F)                 | N 50°49.4' ; E 1°35.4' |
| D                  | D                                    | hermaphroditic          | Erromardie (F)                   | N 43°23.0' ; W 1°39.0' |
| E1                 | E                                    | female                  | Avignonnet-en-L. (F)             | N 43°21.0' ; E 1°47.0' |
| E2                 | E                                    | female                  | Etaples (F)                      | N 50°30.9' ; E 1°38.4' |
| F1                 | F                                    | hermaphroditic          | Gruissan (F)                     | N 43°06.0' ; E 3°05.0' |
| F2                 | F                                    | hermaphroditic          | Zwin (NL)                        | N 51°22.0' ; E 3°22.0' |
| G                  | G                                    | female                  | Etaples (F)                      | N 50°30.9' ; E 1°38.4' |
| H                  | H                                    | female                  | St Puy (F)                       | N 43°52.0' ; E 0°27.0' |
| I1                 | I                                    | hermaphroditic          | Ferrals (F)                      | N 43°08.0' ; E 2°43.0' |
| I2                 | I                                    | hermaphroditic          | Bram (F)                         | N 43°14.0' ; E 2°06.0' |
| K                  | K                                    | hermaphroditic          | Elvas (SP)                       | N 38°52.4' ; W 7°11.8' |
| L                  | L                                    | hermaphroditic          | Vega (SP)                        | N 36°13.4' ; W 5°52.2' |
| M                  | M                                    | hermaphroditic          | Bénissa (SP)                     | N 38°42.0' ; E 0°24.0' |
| N                  | N                                    | unknown                 | Sierra Espuna (SP)               | N 37°53.3' ; W 1°29.5' |
| O                  | O                                    | hermaphroditic          | Montaigut-sur-Save (F)           | N 43°41.0' ; E 1°13.0' |
| P1                 | P                                    | unknown                 | Mèze (F)                         | N 43°25.0' ; E 3°26.0' |
| P2                 | P                                    | unknown                 | Crevillente (SP)                 | N 38°13.8' ; W 0°49.2' |
| S                  | S                                    | unknown                 | Ells Muntels (SP)                | N 40°38.5' ; E 0°44.5' |
| T1                 | T                                    | unknown                 | Ells Muntels (SP)                | N 40°38.5' ; E 0°44.5' |
| T2                 | T                                    | unknown                 | Albox (SP)                       | N 37°23.2' ; W 2°07.9' |
| U                  | U                                    | unknown                 | La Hoya (SP)                     | N 37°42.2' ; W 1°36.1' |
| Nv1                | Nvulg                                | hermaphroditic          | Béziers (F)                      | N 43°20.0' ; E 3°13.0' |
| Nv2                | Nvulg                                | hermaphroditic          | Burghsluis (NL)                  | N 51°40.0' ; E 3°44.0' |
| Nv3                | Nvulg                                | hermaphroditic          | Niewport (B)                     | N 51°09.0' ; E 2°43.0' |
| Nv4                | Nvulg                                | hermaphroditic          | La Maye (F)                      | N 50°37.2' ; E 1°15.7' |
| Nv5                | Nvulg                                | hermaphroditic          | <i>QI</i> (cultivated) (F)       | -                      |
| Sv1                | Svulg                                | female                  | Ault (F)                         | N 50°06.4' ; E 1°27.2' |
| Sv2                | Svulg                                | female                  | <i>Warrior 1</i> (cultivated)(F) | -                      |
| Sv3                | Svulg                                | female                  | <i>NO11</i> (cultivated) (F)     | -                      |
